# Supplementary material for: Copper Ion Attenuated the Antiproliferative Activity of Di-2-pyridylhydrazone Dithiocarbamate Derivative; However, There Was a Lack of Correlation between ROS Generation and Antiproliferative Activity
Source: MDPI journal article supplement (doi:10.3390/molecules21081088), 2016-08-20
Supplement: s1 [file s1]

# Supplementary Materials: Copper Ion Attenuated the Antiproliferative Activity of Di-2-Pyridylhydrazone Dithiocarbamate Derivative; However, There Was a Lack of Correlation between ROS Generation and Antiproliferative Activity

Tingting Wang, Yun Fu, Tengfei Huang, Youxun Liu, Meihao Wu, Yanbin Yuan, Shaoshan Li and Changzheng Li

## 1. Purity of DpdtpA Was Determined by HPLC and NMR

1.1. HPLC (Shimadzu Corporation, Kyoto, Japan) Isolation (Gradient: 20%–50% Solvent B within 10 min, Following Increased to 100% in 10 min, and Decreased to 20% in 2 min. and Keep Same Percent to 30 min). Solvent A: Water Plus 0.1% TFA; Solvent B: Acetonitrile Plus 0.1% TFA)

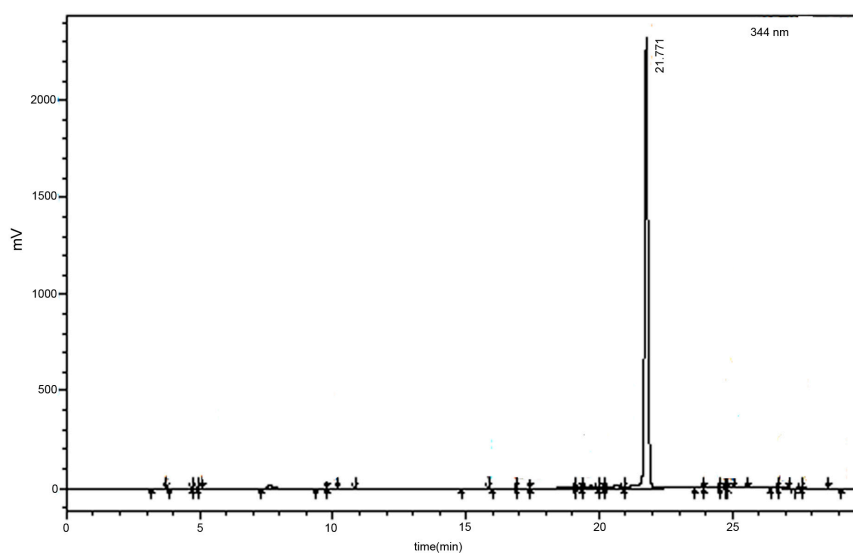

Figure S1. HPLC of DpdtpA

## 1.2. <sup>1</sup>HNMR Spectrum of DpdtpA

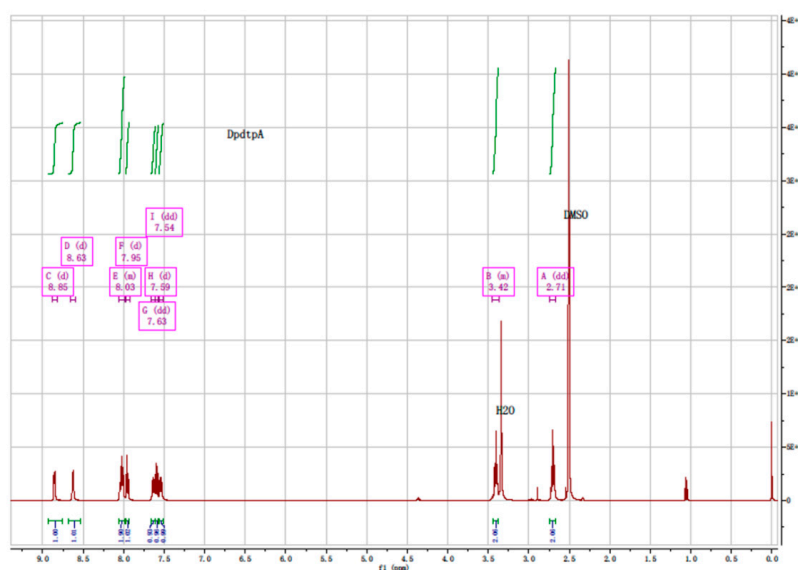

**Figure S2.** HNMR spectrum of DpdtpA.

## 2. Purity of DpdtpA-Cu

2.1. HPLC(Shimadzu Corparation, Kyoto, Japan) Isolation(Gradient: 20%–50% Solven B within 10 min, Following Increased to 100% in 10 min, and Decreased to 20% in 2 min. and Keep Same Percent to 30 min). Solvent A: Water Plus 0.1% TFA; Solvent B: Acetonitrile Plus 0.1% TFA)

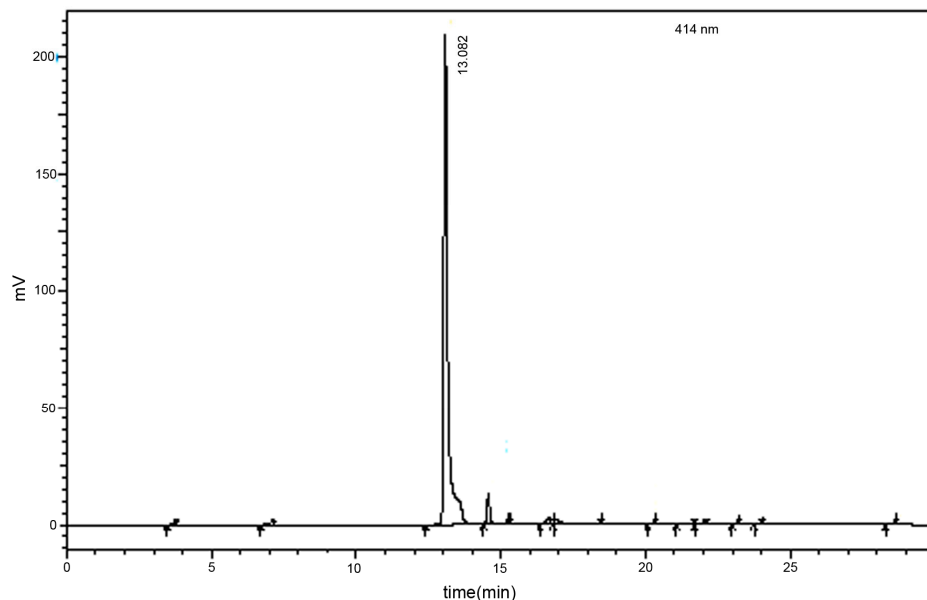**Figure S3.** HPLC of dpdtpA-Cu.

## 2.2. IR Spectrum of DpdtpA-Cu

Based on literature [1,2],  $3273\text{--}3493\text{ cm}^{-1}$  assigned to  $\nu_{\text{NH}}$  of amide,  $1457\text{ cm}^{-1}$  assigned to  $\nu_{\text{C-N}}$  stretching frequency for the thioureide group in the DpdtpA, and  $1230\text{ cm}^{-1}$  were assigned to  $\text{C}=\text{S}$  bond, but in the DpdtpA-Cu, the peaks were disappeared, indicating enolization occurred [1,2].

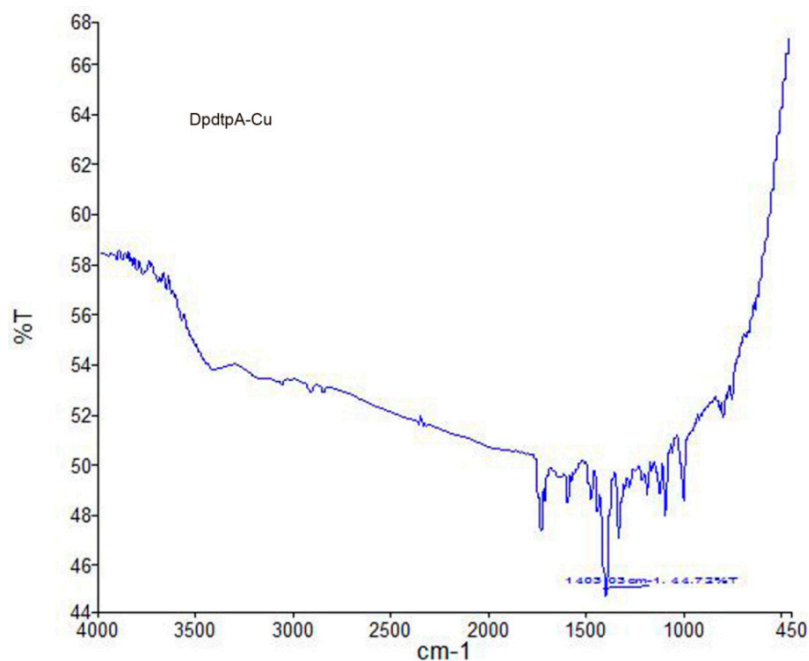**Figure S4.** IR spectrum of DpdtpA-Cu.

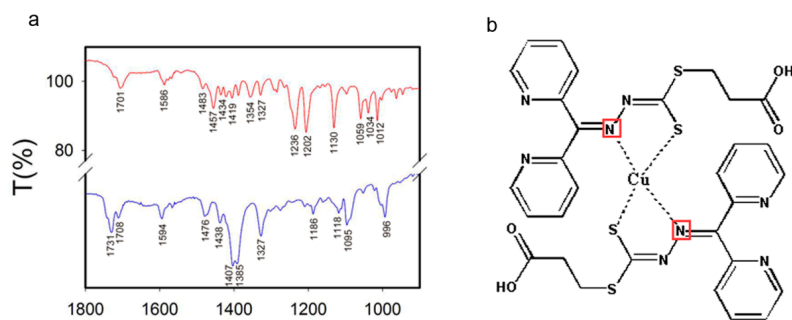

**Figure S5.** (a) IR comparison between DpdtpA (red line) and DpdtpA-Cu (blue line); and (b) coordination structure of DpdtpA-Cu proposed tentatively.

## References

1. SaLİjk, B.N.; Özkay, Y.; Özkay, Ü.D.; Gençer, H.K. Synthesis and biological evaluation of some novel dithiocarbamate derivatives. *J. Chem.* **2014**, doi:10.1155/2014/387309.
2. Nabipour, H. Synthesis of a new dithiocarbamate cobalt complex and its nanoparticles with the study of their biological properties. *Int. J. Nano Dim.* **2011**, *1*, 225–232.
